# Supplementary material
Source: PubMed Central journal article supplement (PMC1589985)
Supplement: 7601319s1.pdf [file 7601319s1.pdf]

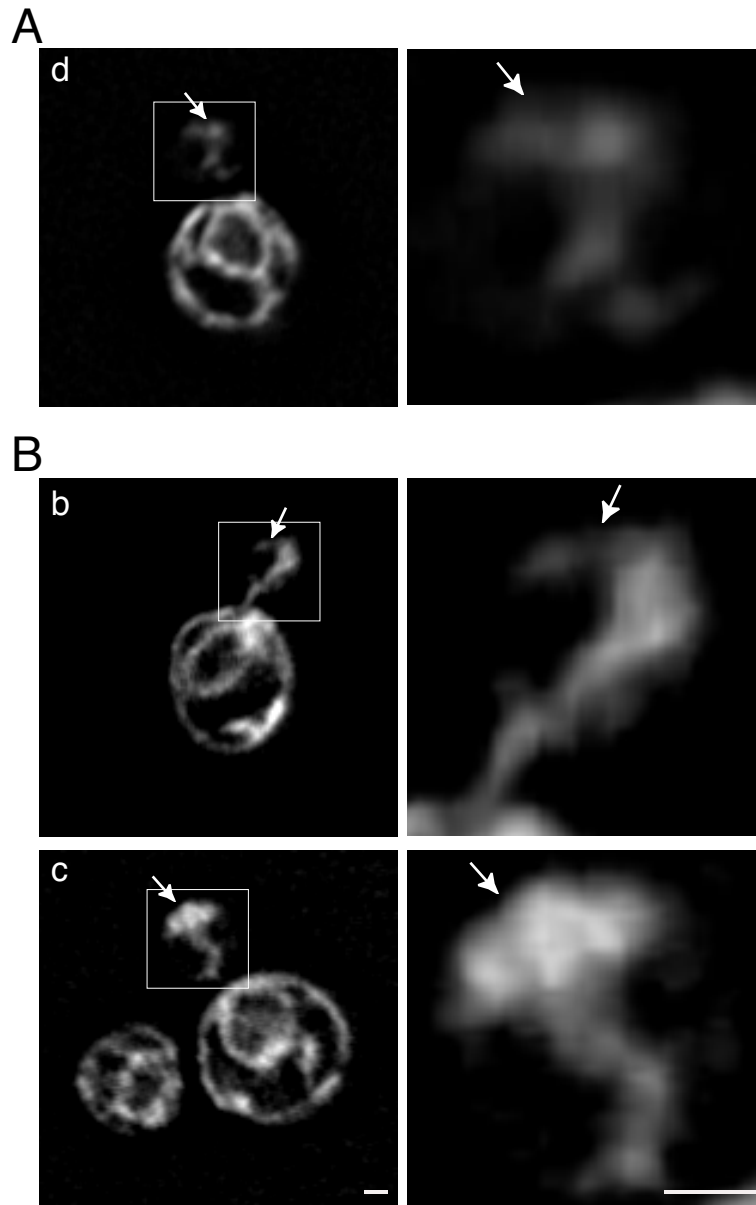

Figure S1

### Supplementary Information

**Fig. S1.** ER tubules in *ptc1Δ* buds form a capped structure at the bud tip. To clearly visualize this capped structure (see arrows), panel d of Figure 1A (*ptc1Δ* cells expressing Hmg1p-GFP) and panels b and c of Figure 1B (*ptc1Δ* cells expressing Ssh1p-GFP) are magnified 3 times. The insets are magnified 4 times in the right column. The scale bars are 1 $\mu$ m.
